# Supplementary material for: Half-sandwich rhodium and iridium metallamacrocycles constructed via C–H activation
Source: Royal Society of Chemistry journal article supplement (doi:10.1039/c5dt04777c), 2016-01-01
Supplement: c5dt04777c1.pdf [file c5dt04777c1.pdf]

## Contents

Figure S1. Simplified wireframe view of complex **1bs** (gray for C, blue for N, red for O, orange for Ir).

Figure S2. (a) Hydrogen bonds between the OTf anions and carbon atoms of complex **1c**; (b) The two-dimension hydrogen function;

Figure S3. The  $^1\text{H}$  NMR spectra of complex **1a-1b**;

Figure S4. The  $^1\text{H}$ - $^1\text{H}$  COSY spectra of the complex **1a-1b**;

Figure S5. The  $^1\text{H}$  NMR spectra of complex **1c**;

Figure S6. The  $^1\text{H}$ - $^1\text{H}$  COSY spectra of the complex **2a-2c**;

Figure S7. (a) Hydrogen bonds between the OTf anions and carbon atoms of complex **2b**; (b) The two-dimension hydrogen function;

Figure S8. (a) Hydrogen bonds between the OTf anions and carbon atoms of complex **2c**; (b) The two-dimension hydrogen function;

Figure S9. The  $^1\text{H}$  NMR spectra of complex **2a-2c**;

Figure S10. Simplified wireframe view of complex **3cs** (gray for C, blue for N, red for O, orange for Ir,).

Figure S11. (a) Hydrogen bonds between the OTf anions and carbon atoms of complex **3c**; (b) The two-dimension hydrogen function;

Figure S12. The  $^1\text{H}$  NMR spectra of complex **3a-3b**;

Figure S13. The  $^1\text{H}$ - $^1\text{H}$  COSY spectra of the complex **3a-3c**;

Figure S14.  $\text{CO}_2$  adsorption-desorption isotherms with complex **3a,b** and **4**;

Table S1. Crystallographic data for complexes **1bs**.

Table S2. Crystallographic data for complexes **3cs**.

**Figure S1.** Simplified wireframe view of complex **1bs** (gray for C, blue for N, red for O, orange for Ir).

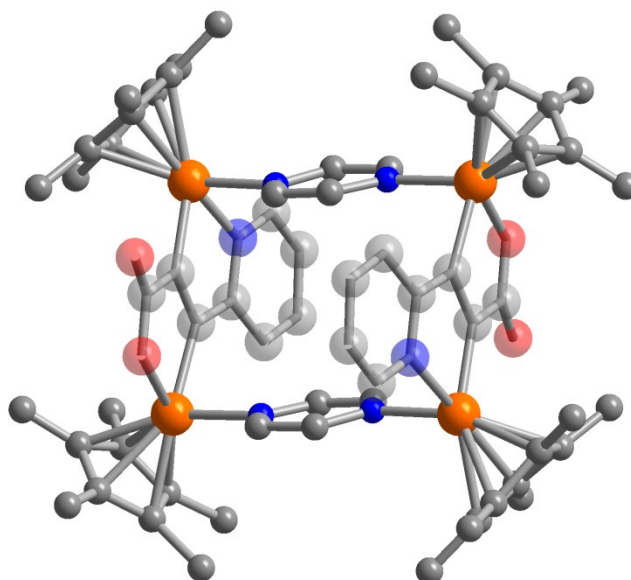

**Figure S2.** (a) Hydrogen bonds between the OTf anions and carbon atoms of complex **1c**; (b) The two-dimension hydrogen function (Gray for C, Blue for N, Red for O, Pink for Rh, Yellow for S, Green for F, Dark green for H.).

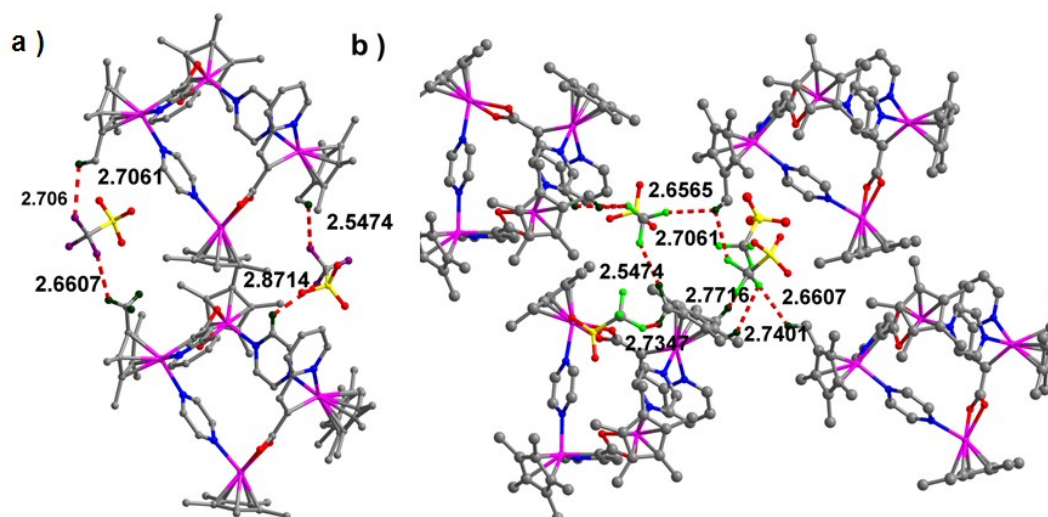

Figure S3. The  $^1\text{H}$  NMR spectra of complex **1a-1b**.

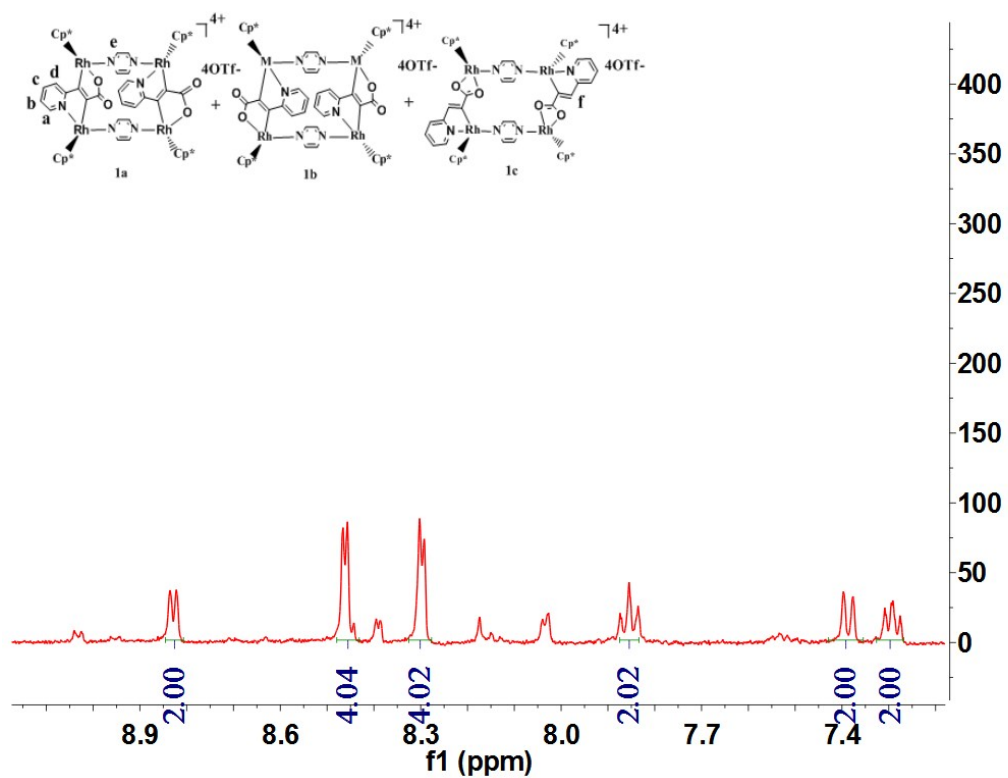

Figure S4. The  $^1\text{H}$ - $^1\text{H}$  COSY spectra of the complex **1a-1b**.

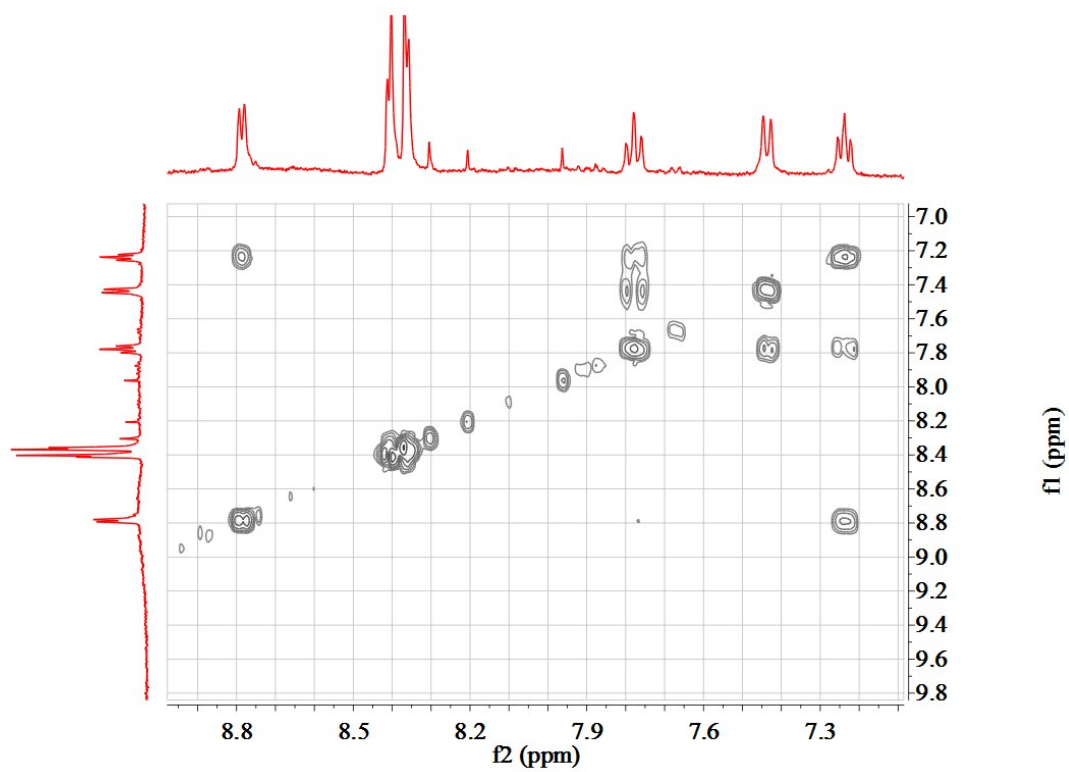

Figure S5. The  $^1\text{H}$  NMR spectra of complex **1c**.

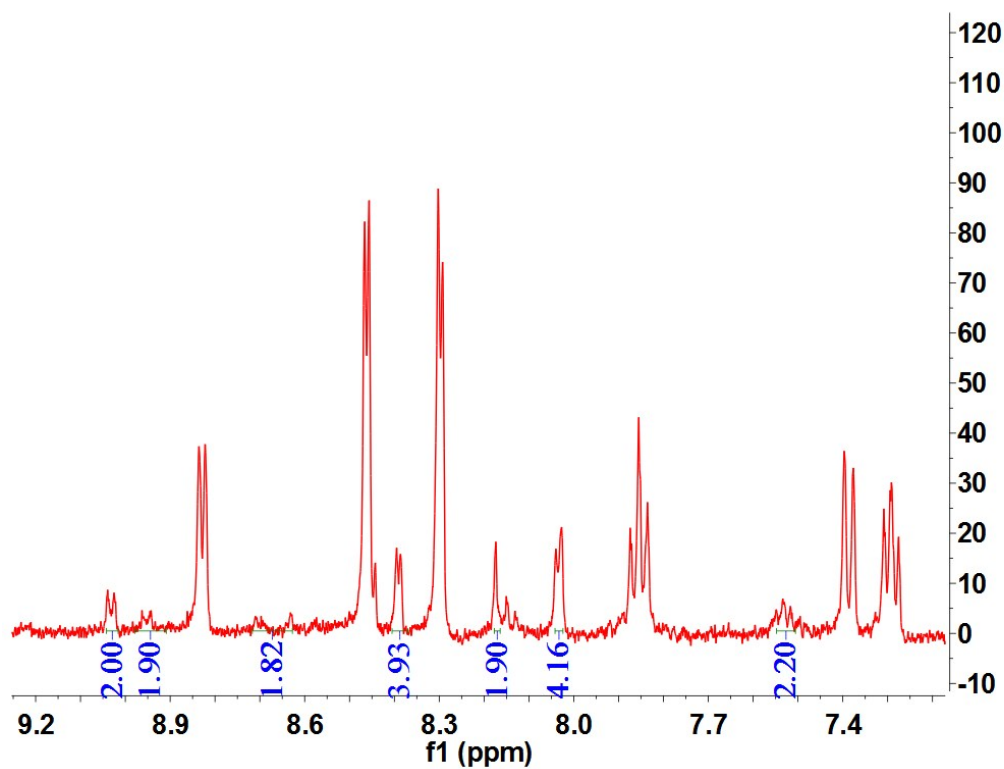

Figure S6. The  $^1\text{H}$ - $^1\text{H}$  COSY spectra of the complex **2a-2c**;

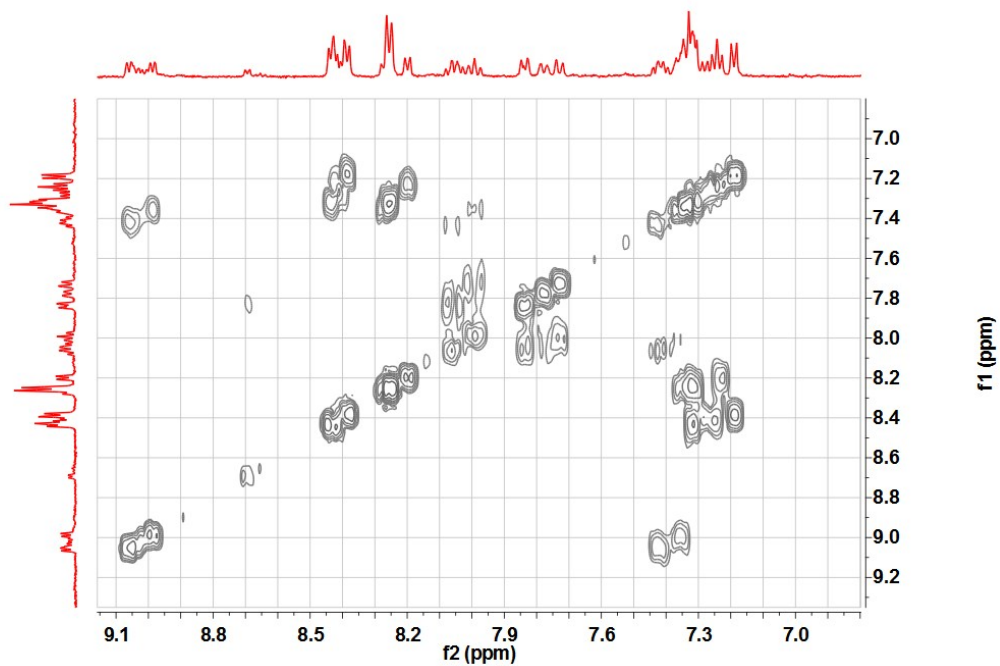

**Figure S7.** (a) Hydrogen bonds between the OTf anions and carbon atoms of complex **2b**; (b) The two-dimension hydrogen function (Gray for C, Blue for N, Red for O, Pink for Rh, Yellow for S, Green for F, Dark green for H.).

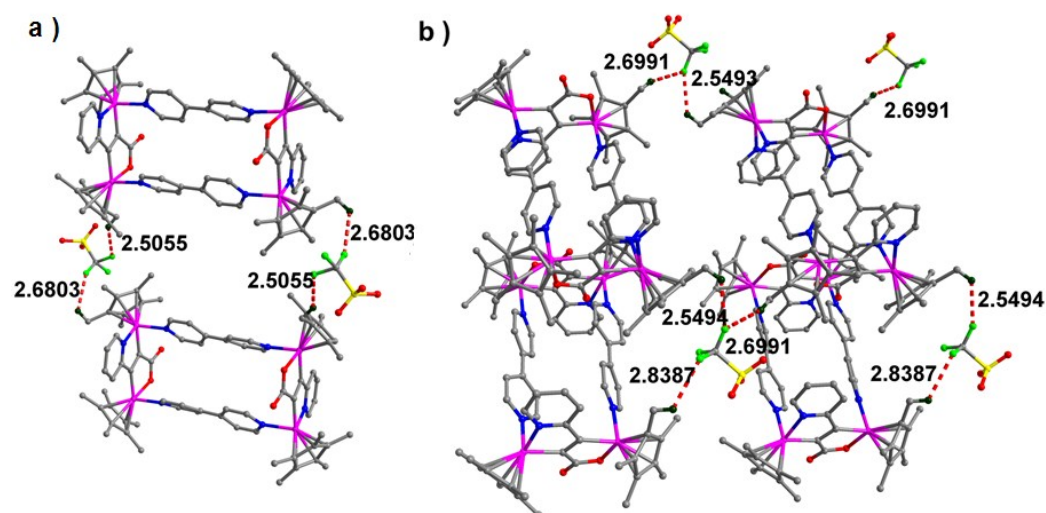

**Figure S8.** (a) Hydrogen bonds between the OTf anions and carbon atoms of complex **2c**; (b) The two-dimension hydrogen function (Gray for C, Blue for N, Red for O, Pink for Rh, Yellow for S, Green for F, Dark green for H.).

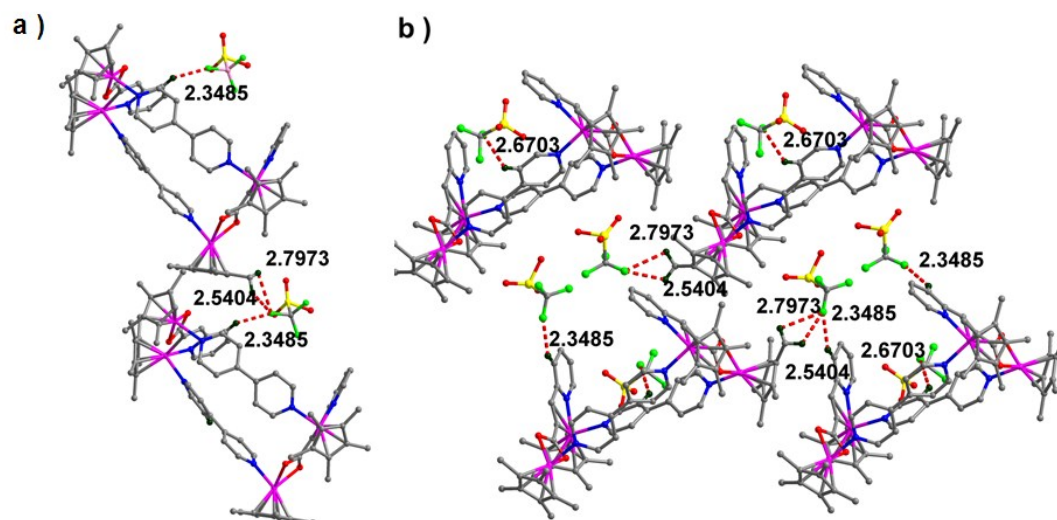

**Figure S9.** The  $^1\text{H}$  NMR spectra of complex **2a-2c**;

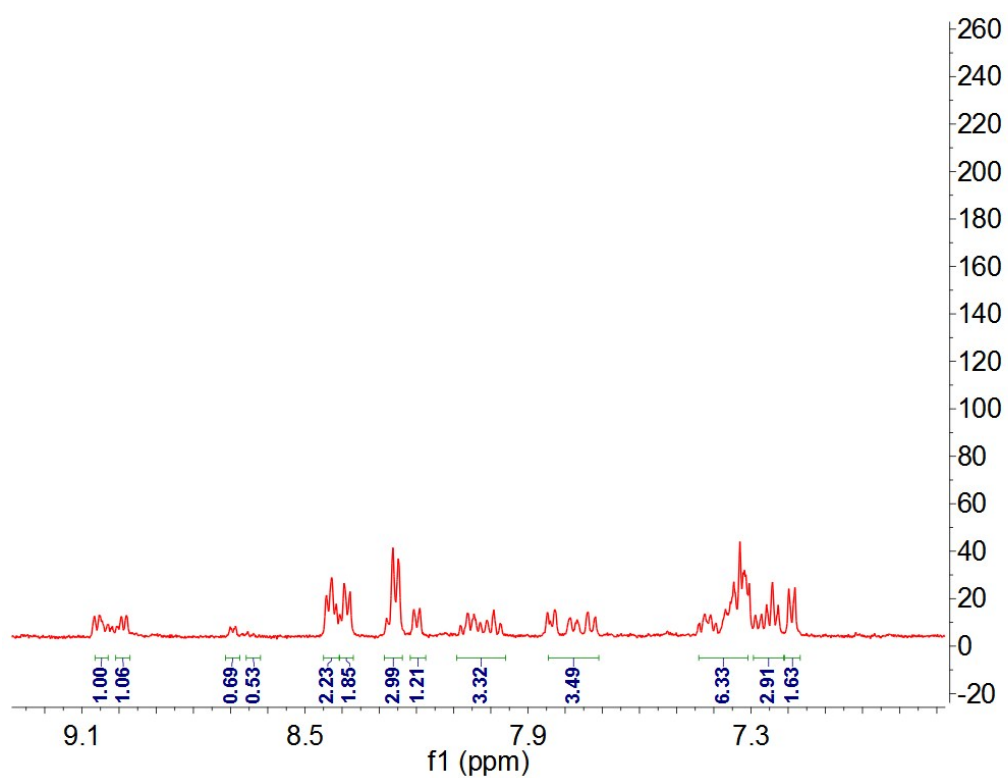

**Figure S10.** Simplified wireframe view of complex **3cs** (gray for C, blue for N, red for O, orange for Ir).

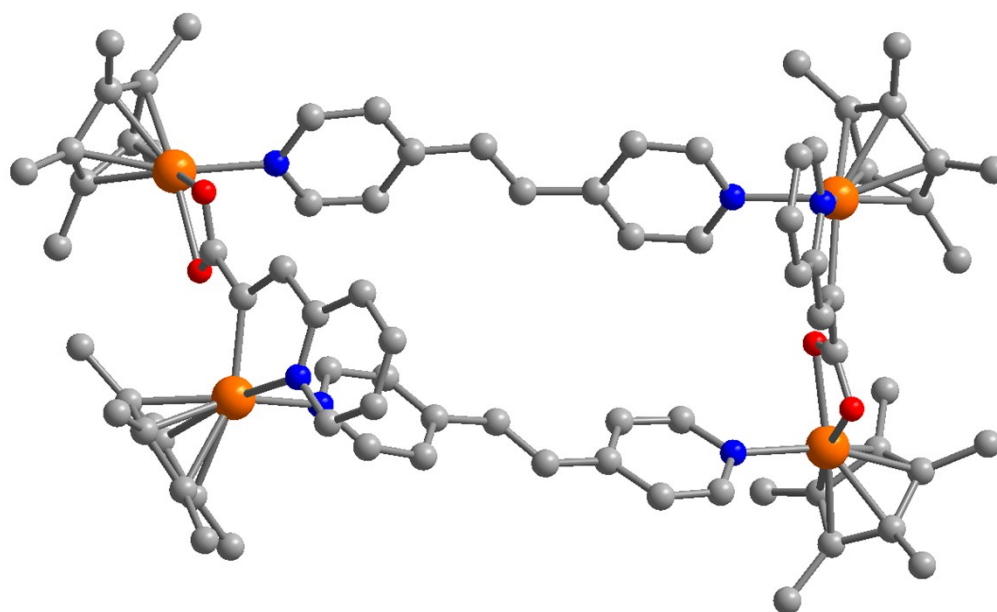

**Figure S11.** (a) Hydrogen bonds between the OTf anions and carbon atoms of complex **3c**; (b) The two-dimension hydrogen function (Gray for C, Blue for N, Red for O, Pink for Rh, Yellow for S, Green for F, Dark green for H.).

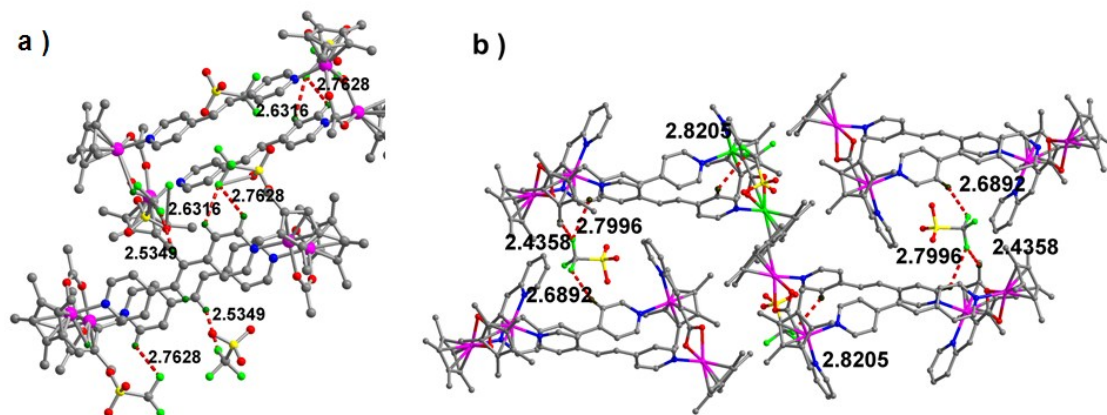

**Figure S12.** The  $^1\text{H}$  NMR spectra of complex **3a-3c**.

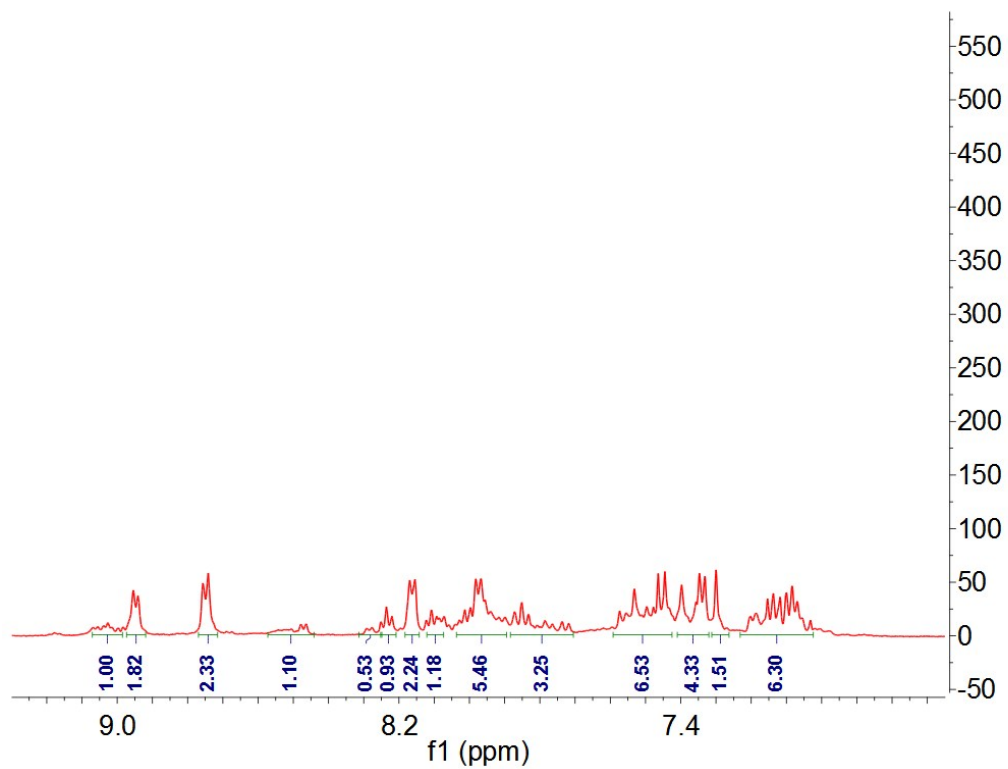

Figure S13. The  $^1\text{H}$ - $^1\text{H}$  COSY spectra of the complex **3a-3c**.

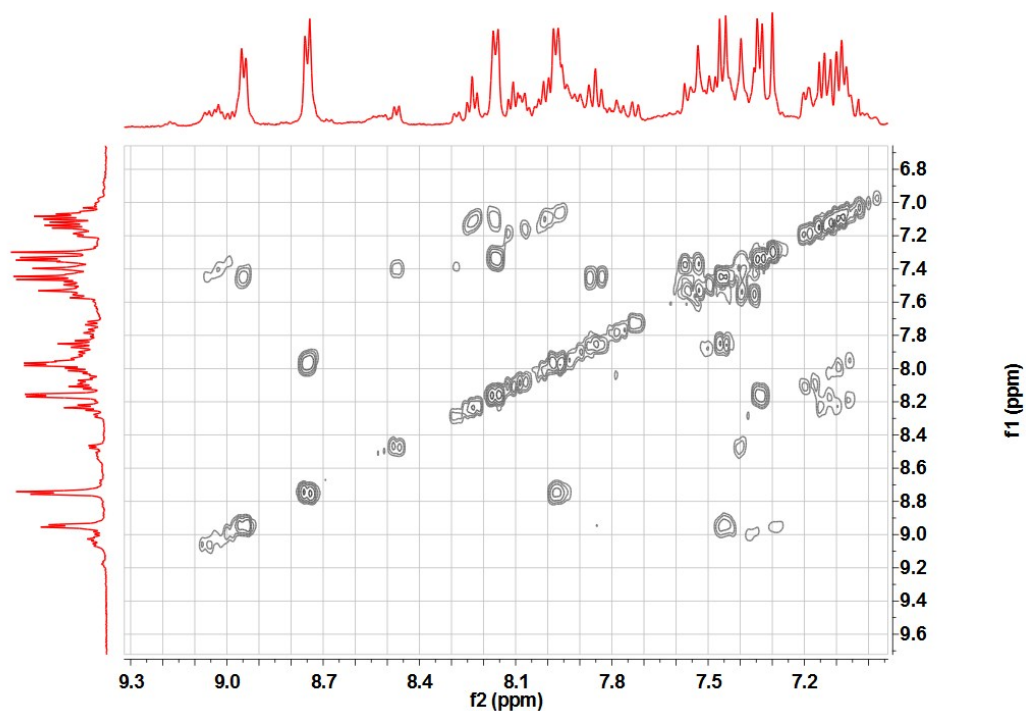

Figure S14.  $\text{CO}_2$  adsorption-desorption isotherms with complex **3a,b** and **4**.

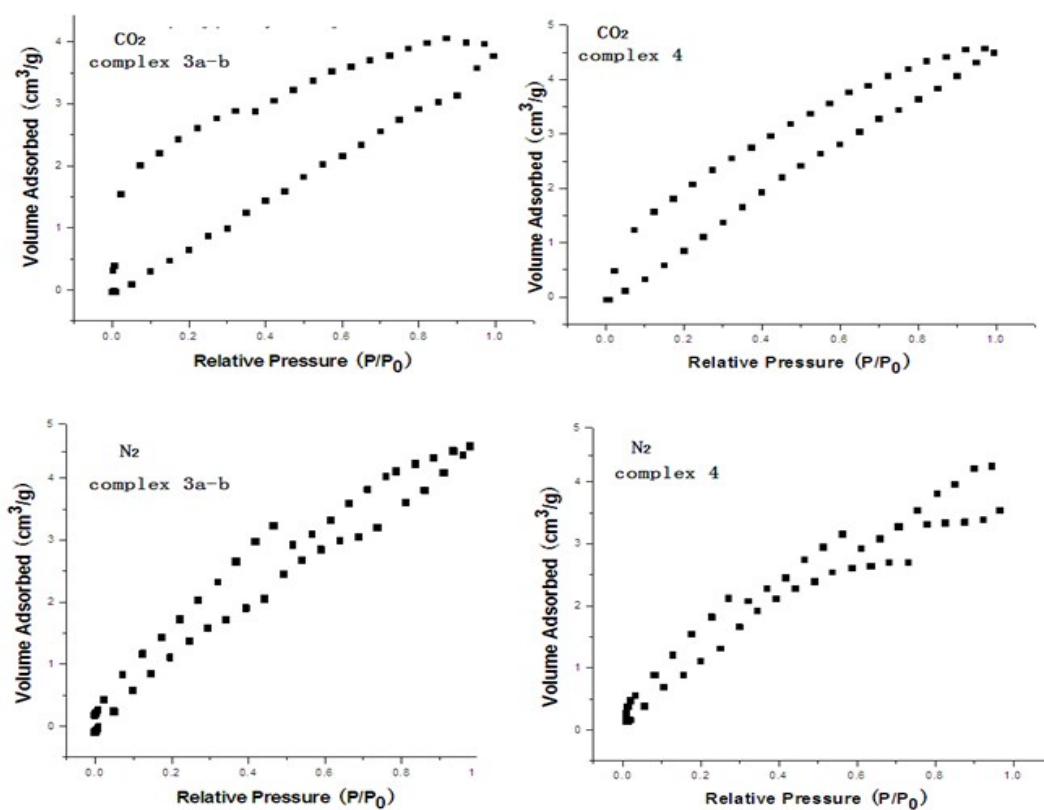



**Table S1.** Crystallographic data for complexes **1bs**

---

|                                   |                                                                                                                |                   |
|-----------------------------------|----------------------------------------------------------------------------------------------------------------|-------------------|
| Complex                           | <b>1bs</b>                                                                                                     |                   |
| Empirical formula                 | C <sub>80</sub> H <sub>108</sub> F <sub>12</sub> Ir <sub>4</sub> N <sub>8</sub> O <sub>16</sub> S <sub>4</sub> |                   |
| Formula weight                    | 2562.78                                                                                                        |                   |
| Temperature                       | 293(2) K                                                                                                       |                   |
| Wavelength                        | 0.71073 Å                                                                                                      |                   |
| Crystal system                    | Triclinic                                                                                                      |                   |
| Space group                       | P -1                                                                                                           |                   |
| Unit cell dimensions              | a = 14.728(15) Å                                                                                               | α = 117.078(17)°. |
|                                   | b = 14.785(16) Å                                                                                               | β = 91.549(16)°.  |
|                                   | c = 15.17(3) Å                                                                                                 | γ = 117.800(12)°. |
| Volume                            | 2479(6) Å <sup>3</sup>                                                                                         |                   |
| Z                                 | 1                                                                                                              |                   |
| Density (calculated)              | 1.717 Mg/m <sup>3</sup>                                                                                        |                   |
| Absorption coefficient            | 5.519 mm <sup>-1</sup>                                                                                         |                   |
| F(000)                            | 1252                                                                                                           |                   |
| Crystal size                      | 0.210 x 0.160 x 0.110 mm <sup>3</sup>                                                                          |                   |
| Theta range for data collection   | 1.673 to 25.009°.                                                                                              |                   |
| Index ranges                      | -17<=h<=14, -13<=k<=17, -17<=l<=18                                                                             |                   |
| Reflections collected             | 11753                                                                                                          |                   |
| Independent reflections           | 8403 [R(int) = 0.0314]                                                                                         |                   |
| Completeness to theta = 25.242°   | 93.5 %                                                                                                         |                   |
| Absorption correction             | Semi-empirical from equivalents                                                                                |                   |
| Max. and min. transmission        | 0.746 and 0.481                                                                                                |                   |
| Refinement method                 | Full-matrix least-squares on F <sup>2</sup>                                                                    |                   |
| Data / restraints / parameters    | 8403 / 62 / 556                                                                                                |                   |
| Goodness-of-fit on F <sup>2</sup> | 0.989                                                                                                          |                   |
| Final R indices [I>2sigma(I)]     | R1 = 0.0804, wR2 = 0.2282                                                                                      |                   |
| R indices (all data)              | R1 = 0.1091, wR2 = 0.2633                                                                                      |                   |
| Extinction coefficient            | n/a                                                                                                            |                   |
| Largest diff. peak and hole       | 3.876 and -4.140 e.Å <sup>-3</sup>                                                                             |                   |

---

**Table S2.** Crystallographic data for complexes **3cs**

---

|                                   |                                                                                                                                |                     |
|-----------------------------------|--------------------------------------------------------------------------------------------------------------------------------|---------------------|
| Complex                           | <b>3cs</b>                                                                                                                     |                     |
| Empirical formula                 | C <sub>92</sub> H <sub>114</sub> Cl <sub>8</sub> F <sub>12</sub> Ir <sub>4</sub> N <sub>6</sub> O <sub>20</sub> S <sub>4</sub> |                     |
| Formula weight                    | 3032.53                                                                                                                        |                     |
| Temperature                       | 173(2) K                                                                                                                       |                     |
| Wavelength                        | 0.71073 Å                                                                                                                      |                     |
| Crystal system, space group       | Monoclinic, C 2/c                                                                                                              |                     |
| Unit cell dimensions              | a = 20.973(3) Å                                                                                                                | α = 90 deg.         |
|                                   | b = 15.042(2) Å                                                                                                                | β = 101.963(2) deg. |
|                                   | c = 36.067(5) Å                                                                                                                | γ = 90 deg.         |
| Volume                            | 11131(3) Å <sup>3</sup>                                                                                                        |                     |
| Z, Calculated density             | 4, 1.810 Mg/m <sup>3</sup>                                                                                                     |                     |
| Absorption coefficient            | 5.120 mm <sup>-1</sup>                                                                                                         |                     |
| F(000)                            | 5936                                                                                                                           |                     |
| Crystal size                      | 0.090 x 0.040 x 0.030 mm                                                                                                       |                     |
| Theta range for data collection   | 1.154 to 26.999 deg.                                                                                                           |                     |
| Limiting indices                  | -26 ≤ h ≤ 26, -19 ≤ k ≤ 17, -46 ≤ l ≤ 43                                                                                       |                     |
| Reflections collected / unique    | 37332 / 12104 [R(int) = 0.0551]                                                                                                |                     |
| Completeness to theta = 25.242    | 99.5 %                                                                                                                         |                     |
| Absorption correction             | Semi-empirical from equivalents                                                                                                |                     |
| Max. and min. transmission        | 0.746 and 0.380                                                                                                                |                     |
| Refinement method                 | Full-matrix least-squares on F <sup>2</sup>                                                                                    |                     |
| Data / restraints / parameters    | 12104 / 28 / 600                                                                                                               |                     |
| Goodness-of-fit on F <sup>2</sup> | 1.096                                                                                                                          |                     |
| Final R indices [I > 2σ(I)]       | R1 = 0.0828, wR2 = 0.1945                                                                                                      |                     |
| R indices (all data)              | R1 = 0.1009, wR2 = 0.2021                                                                                                      |                     |
| Extinction coefficient            | n/a                                                                                                                            |                     |
| Largest diff. peak and hole       | 5.875 and -4.757 e.Å <sup>-3</sup>                                                                                             |                     |

---
